# Supplementary material for: Mindful Eating Questionnaire: Validation and Reliability in Romanian Adults
Source: MDPI journal article supplement (doi:10.3390/ijerph191710517), 2022-08-24
Supplement: s1 [file s1]

## Supplementary Material

Table S1. Mindful Eating Questionnaire–Romanian version.

| Questions                                                                                                       | Intrebări                                                                                                                  |
|-----------------------------------------------------------------------------------------------------------------|----------------------------------------------------------------------------------------------------------------------------|
| 1. I eat so quickly that I don't taste what I'm eating.                                                         | 1. Mănânc așa de repede încât nu simt ceea ce mănânc.                                                                      |
| 2. When I eat at "all you can eat" buffets, I tend to overeat.                                                  | 2. Când mănânc la "bufet suedez" am tendința să îmi pun în exces.                                                          |
| 3. At a party where there is a lot of good food, I notice when it makes me want to eat more food than I should. | 3. La o petrecere la care se mănâncă multă mâncare bună, observ când îmi vine să mănânc mai multă mâncare decât ar trebui. |
| 4. I recognize when food advertisements make me want to eat.                                                    | 4. Conștientizez când reclamele la alimente mă fac să vreau să mănânc.                                                     |
| 5. When a restaurant portion is too large, I stop eating when I'm full.                                         | 5. Când o porție de la restaurant este prea mare, mă opresc din mâncat când sunt sătul.                                    |
| 6. My thoughts tend to wander while I am eating.                                                                | 6. Gândurile mele tind să rătăcească în timp ce mănânc.                                                                    |
| 7. When I'm eating one of my favorite foods, I don't recognize when I've had enough.                            | 7. Când mănânc unul dintre alimentele mele preferate, nu știu când să mă opresc.                                           |
| 8. I notice when just going into a movie theater makes me want to eat candy or popcorn.                         | 8. Îmi dau seama că dacă mă aflu într-un cinematograf îmi vine să mănânc popcorn sau dulciuri.                             |
| 9. If it doesn't cost much more, I get the larger size food or drink regardless of how hungry I feel.           | 9. Dacă nu costă mult în plus, prefer porția mare de mâncare sau băutură, indiferent de cât de foame îmi este.             |
| 10. I notice when there are subtle flavors in the foods I eat.                                                  | 10. Îmi dau seama când există arome subtile în alimentele pe care le consum.                                               |
| 11. If there are leftovers that I like, I take a second helping even though I'm full.                           | 11. Dacă de la o masă rămâne mâncare care îmi place, iau o a doua porție, chiar dacă sunt sătul(ă).                        |
| 12. When eating a pleasant meal, I notice if it makes me feel relaxed.                                          | 12. Când mănânc mâncare care îmi place, observ că mă face să mă simt relaxat(ă).                                           |
| 13. I snack without noticing that I am eating.                                                                  | 13. Iau gustări fără să realizez că mănânc.                                                                                |
| 14. When I eat a big meal, I notice if it makes me feel heavy or sluggish.                                      | 14. Când mănânc o masă copioasă, observ dacă mă face să mă simt greu sau moleșit.                                          |
| 15. I stop eating when I'm full even when eating something I love.                                              | 15. Mă opresc din mâncat când mă simt sătul(ă), chiar dacă mănânc ceva ce îmi place.                                       |
| 16. I appreciate the way my food looks on my plate.                                                             | 16. Apreciez modul de prezentare din farfurie.                                                                             |
| 17. When I'm feeling stressed at work, I'll go find something to eat.                                           | 17. Când muncesc și mă simt stresat(ă), merg să găsesc ceva de mâncare.                                                    |
| 18. If there's good food at a party, I'll continue eating even after I'm full.                                  | 18. Dacă există mâncare bună la o petrecere, voi continua să mănânc chiar și după ce sunt sătul(ă).                        |
| 19. When I'm sad, I eat to feel better.                                                                         | 19. Când sunt trist, mănânc ca să mă simt mai bine.                                                                        |
| 20. I notice when foods and drinks are too sweet.                                                               | 20. Îmi dau seama când mâncarea sau băutura sunt prea dulci.                                                               |
| 21. Before I eat I take a moment to appreciate the colors and smells of my food.                                | 21. Înainte să mănânc, stau un pic să evaluez culorile și mirosul mâncării.                                                |

|                                                                                                 |                                                                                            |
|-------------------------------------------------------------------------------------------------|--------------------------------------------------------------------------------------------|
| 22. I taste every bite of food that I eat.                                                      | 22. Savurez fiecare îmbucătură din mâncare.                                                |
| 23. I recognize when I'm eating and not hungry.                                                 | 23. Îmi dau seama că mănânc, deși nu îmi este foame.                                       |
| 24. I notice when I'm eating from a dish of candy just because it's there.                      | 24. Îmi dau seama când mănânc dintr-un bol cu bomboane doar pentru că sunt acolo.          |
| 25. When I'm at a restaurant, I can tell when the portion I've been served is too large for me. | 25. Când sunt la restaurant, îmi dau seama când porția servită este prea mare pentru mine. |
| 26. I notice when the food I eat affects my emotional state.                                    | 26. Îmi dau seama când mâncarea îmi schimbă starea emoțională.                             |
| 27. I have trouble not eating ice cream, cookies, or chips if they're around the house.         | 27. Nu mă pot abține din a mânca înghețată, prăjituri sau chipsuri dacă le găsesc în casă. |
| 28. I think about things I need to do while I am eating.                                        | 28. Când mănânc, mă gândesc la lucruri pe care trebuie să le fac.                          |
